# Supplementary material for: Cold-Sintered ZnO Ceramic Composites Co-Doped with Polytetrafluoroethylene and Oxides
Source: MDPI journal article supplement (doi:10.3390/molecules29010129), 2023-12-25
Supplement: s1 [file s1]

# Cold sintered ZnO ceramic composites co-doped with polytetrafluoroethylene and oxides

Yongjian Xiao <sup>1</sup>, Yang Yang <sup>1</sup>, Shenglin Kang <sup>1</sup>, Yuchen Li <sup>1</sup>, Xinyuan Hou <sup>1</sup>, Chengjun Ren <sup>2</sup>, Xilin Wang <sup>3</sup>, Xueting Zhao <sup>1,\*</sup>

- <sup>1</sup> State Key Laboratory of Power Transmission Equipment & System Security and New Technology, Chongqing University, Shapingba District, Chongqing, 400044, PR China; 202111021022@stu.cqu.edu.cn (Y.X.); 985232908@qq.com (Y.Y.); ksl124@cqu.edu.cn (S.K.); 202211021082t@stu.cqu.edu.cn (Y.L.); 202311021031@stu.cqu.edu.cn (X.H.);
- <sup>2</sup> Southwest Branch, State Grid Corporation of China, Chengdu 610041, Sichuan, People's Republic of China; gwxnfb@sw.sgcc.com.cn (C.R.);
- <sup>3</sup> Tsinghua Shenzhen International Graduate School, Tsinghua University, Shenzhen 518055, Guangdong, China; wang.xilin@sz.tsinghua.edu.cn (X.W.);
- \* Correspondence: zxt201314@cqu.edu.cn (X.Z.);

## Supplementary Figure

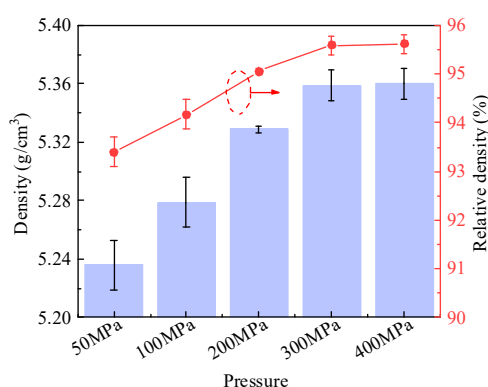

**Figure S1.** The density of ZnO ceramic samples at different sintering pressures

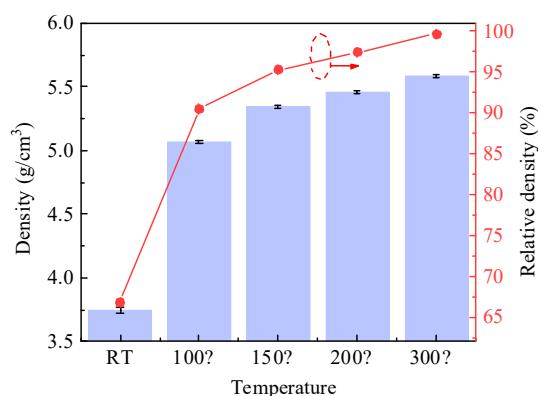

**Figure S2.** The density of ZnO ceramic samples at different sintering temperatures

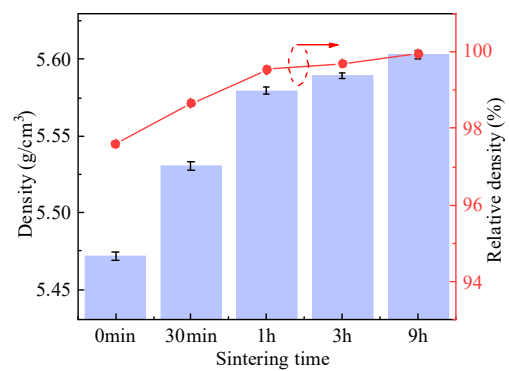

**Figure S3.** The density of ZnO ceramic samples at different sintering time
